# Supplementary material for: Cannabinoids in Chronic Non-Cancer Pain: A Systematic Review and Meta-Analysis
Source: PubMed Central journal article supplement — Clin Med Insights Arthritis Musculoskelet Disord. 2020 Feb 19;13:1179544120906461. doi: 10.1177/1179544120906461 (PMC7031792; doi:10.1177/1179544120906461), 2020-02-19
Supplement: Suppl_fig_and_table.pdf [file Suppl_fig_and_table.pdf]

# e-Figures 1- 22

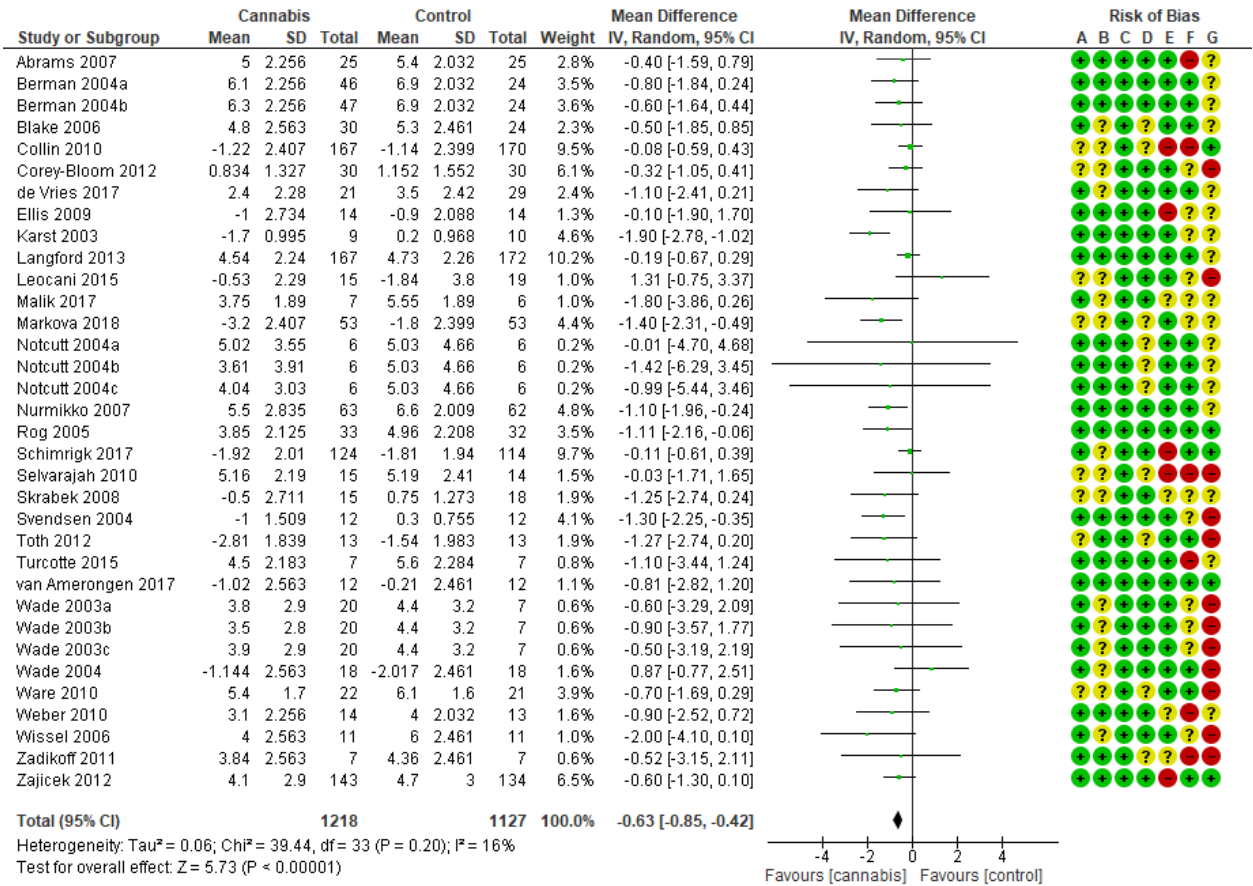

**Risk of bias legend**

- (A) Random sequence generation (selection bias)
- (B) Allocation concealment (selection bias)
- (C) Blinding of participants and personnel (performance bias)
- (D) Blinding of outcome assessment (detection bias)
- (E) Incomplete outcome data (attrition bias)
- (F) Selective reporting (reporting bias)
- (G) Other bias

**Legend**

- Low risk of bias
- High risk of bias
- Unclear risk of bias

e-Figure 1. Forest plot of medical cannabis (intervention) versus placebo (control) for chronic non-cancer pain (0-10 visual analogue scale, higher score more pain); all included studies at the longest duration of follow-up.

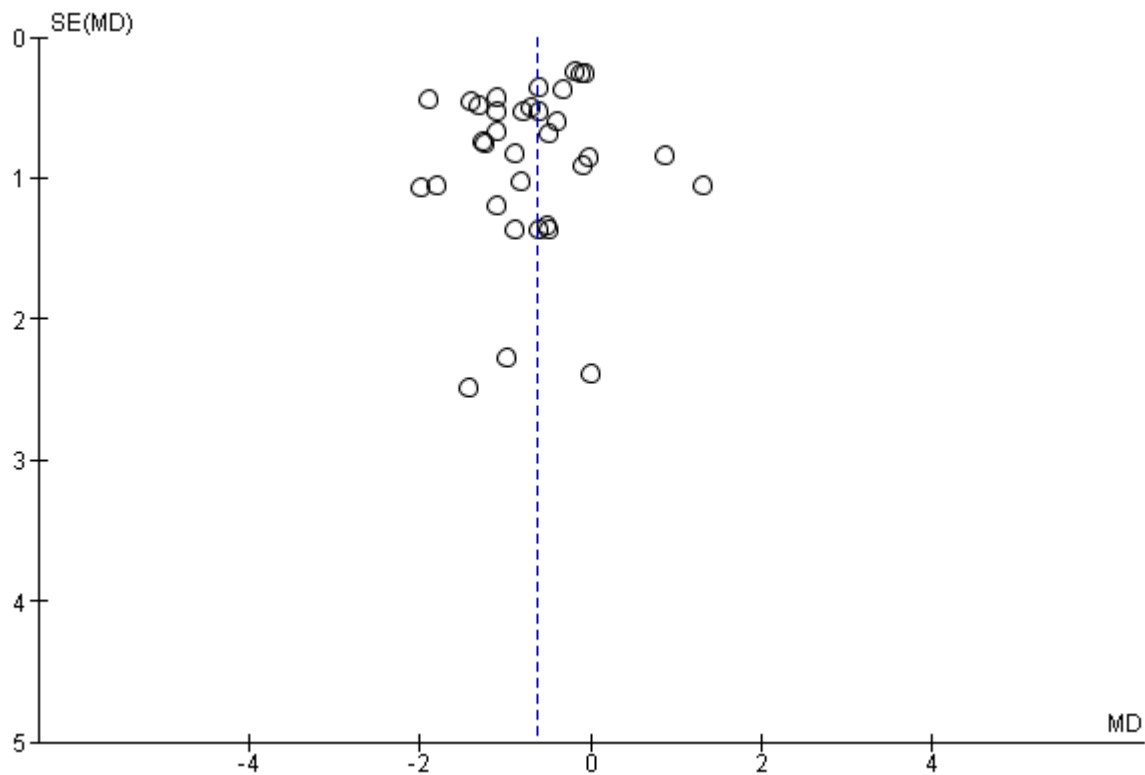

e-Figure 2. Funnel plot of medical cannabis (intervention) versus placebo (control) for chronic non-cancer pain to assess for publication bias); all included studies at the longest duration of follow-up. Effect estimates (mean difference MD) is on the x-axis, study precision (standard error, SE) is on the y-axis.

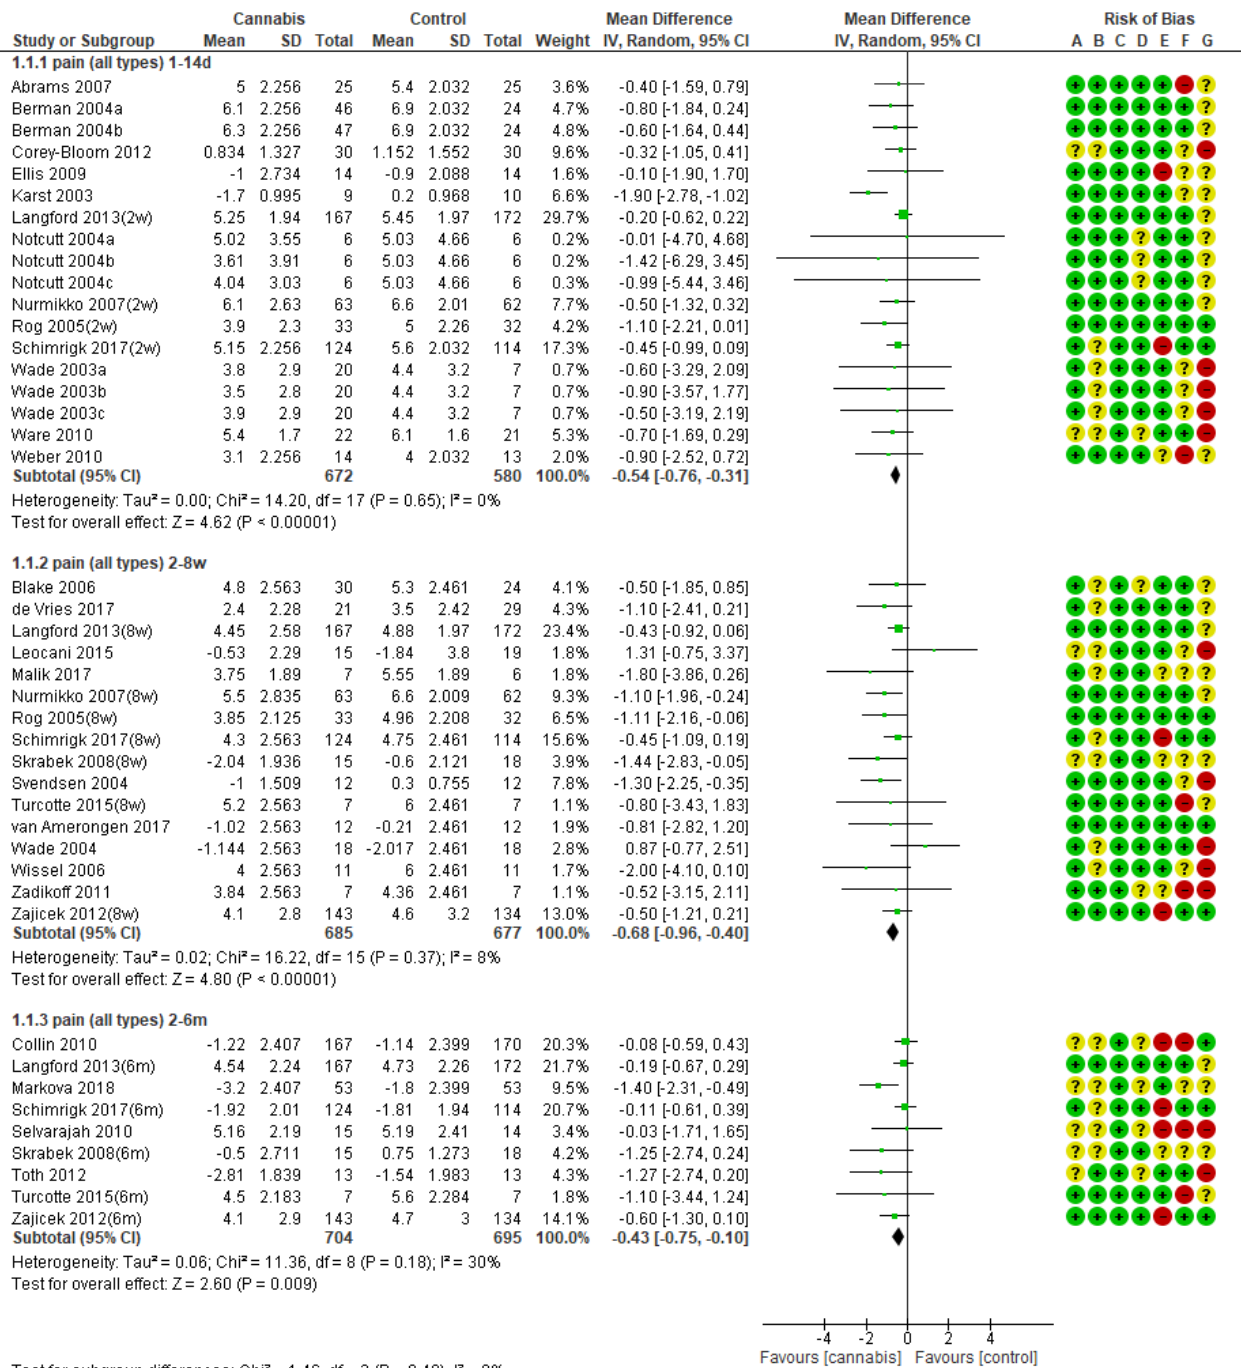

Test for subgroup differences: Chi<sup>2</sup> = 1.46, df = 2 (P = 0.48), I<sup>2</sup> = 0%

**Risk of bias legend**

- (A) Random sequence generation (selection bias)
- (B) Allocation concealment (selection bias)
- (C) Blinding of participants and personnel (performance bias)
- (D) Blinding of outcome assessment (detection bias)
- (E) Incomplete outcome data (attrition bias)
- (F) Selective reporting (reporting bias)
- (G) Other bias

e-Figure 3. Forest plot of medical cannabis (intervention) versus placebo (control) for chronic non-cancer pain (0-10 visual analogue scale, higher score more pain) by duration of follow-up.

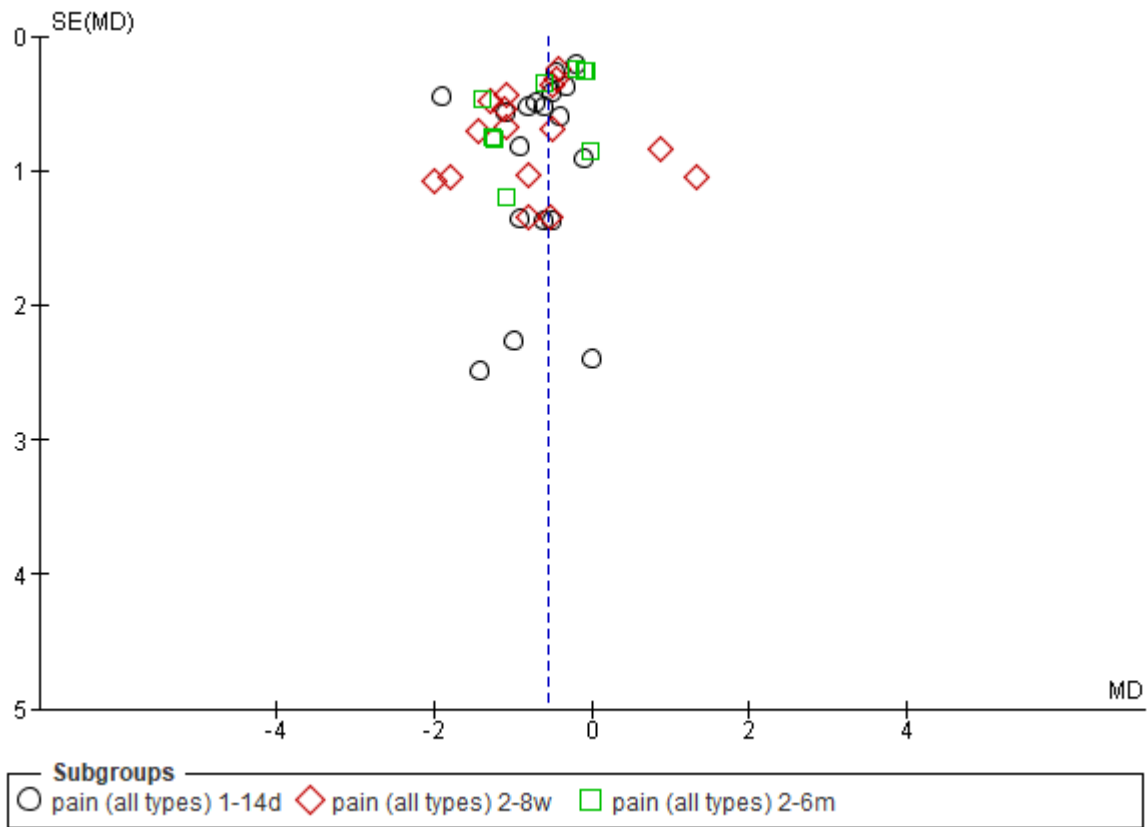

e-Figure 4. Funnel plot of medical cannabis (intervention) versus placebo (control) for chronic non-cancer pain by duration of treatment, to assess for publication bias. Effect estimates (mean difference MD) is on the x-axis, study precision (standard error, SE) is on the y-axis.

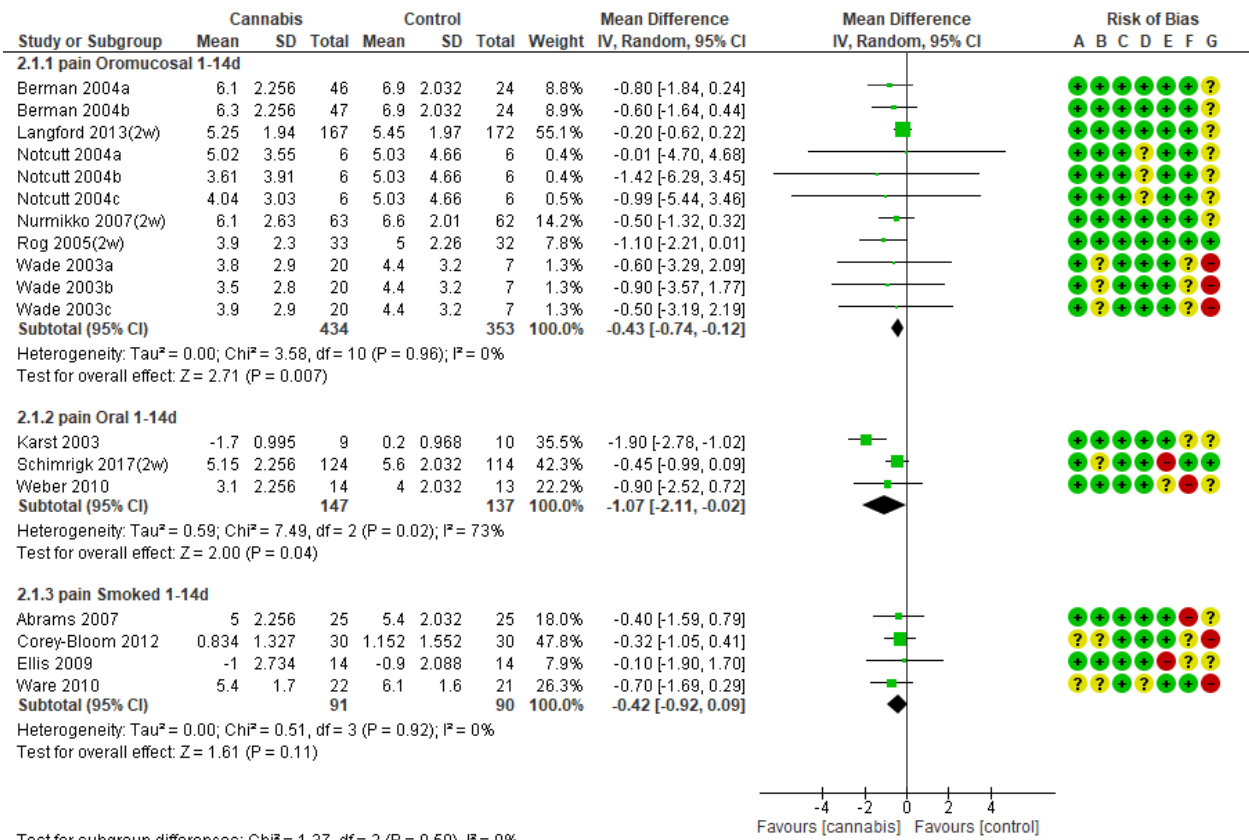

e-Figure 5. Forest plot of medical cannabis (intervention) versus placebo (control) for chronic non-cancer pain (0-10 visual analogue scale, higher score more pain) at 1-14 days follow-up, stratified by route of administration.

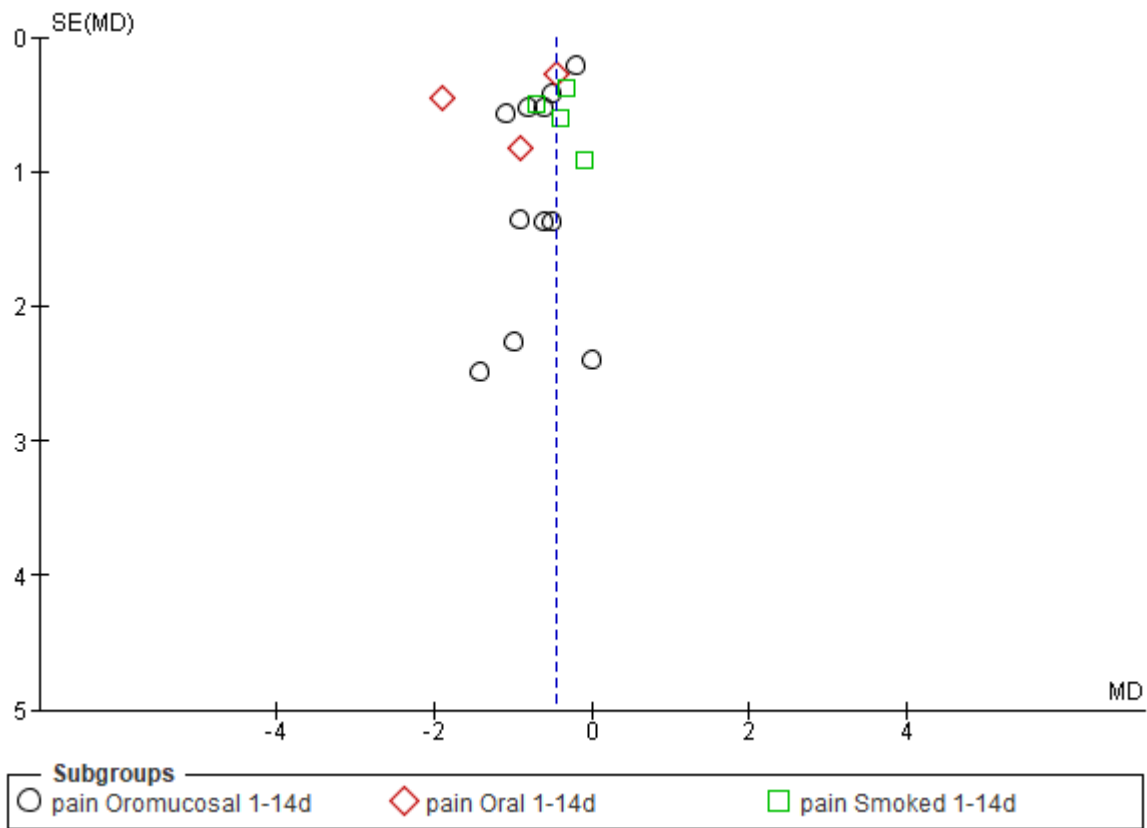

e-Figure 6. Funnel plot of medical cannabis (intervention) versus placebo (control) for chronic non-cancer pain at 1-14 days follow-up by route of administration, to assess for publication bias. Effect estimates (mean difference MD) is on the x-axis, study precision (standard error, SE) is on the y-axis.

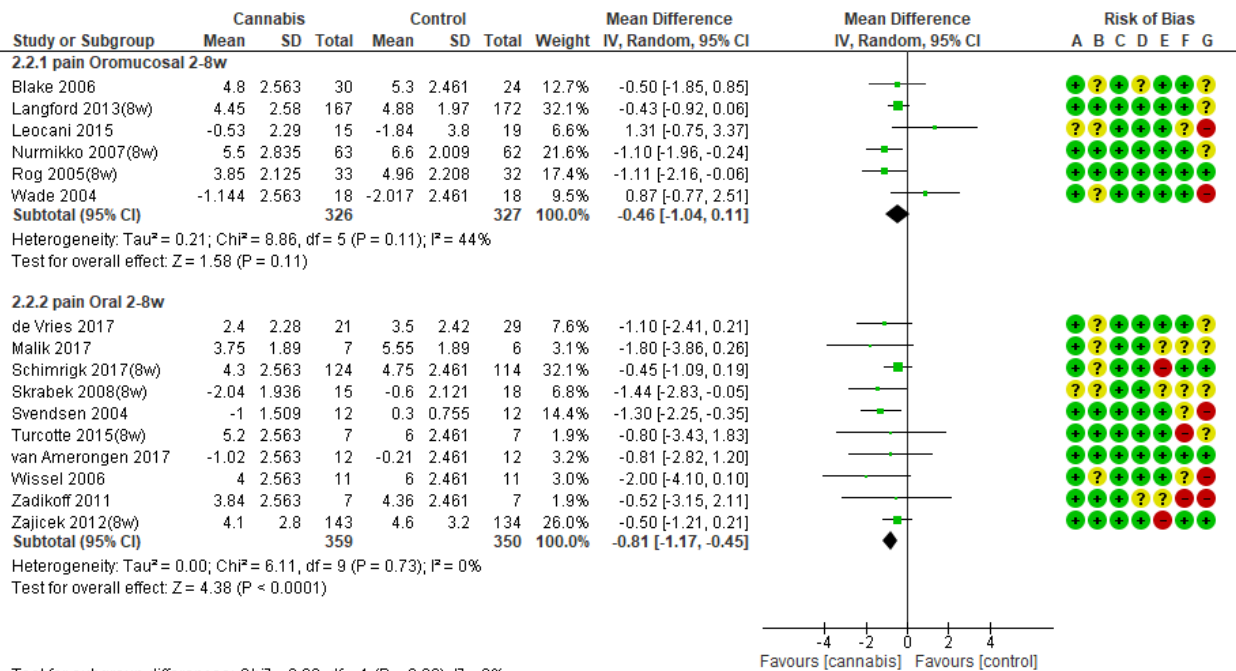

e-Figure 7. Forest plot of medical cannabis (intervention) versus placebo (control) for chronic non-cancer pain (0-10 visual analogue scale, higher score more pain) at 2-8 weeks follow-up, stratified by route of administration.

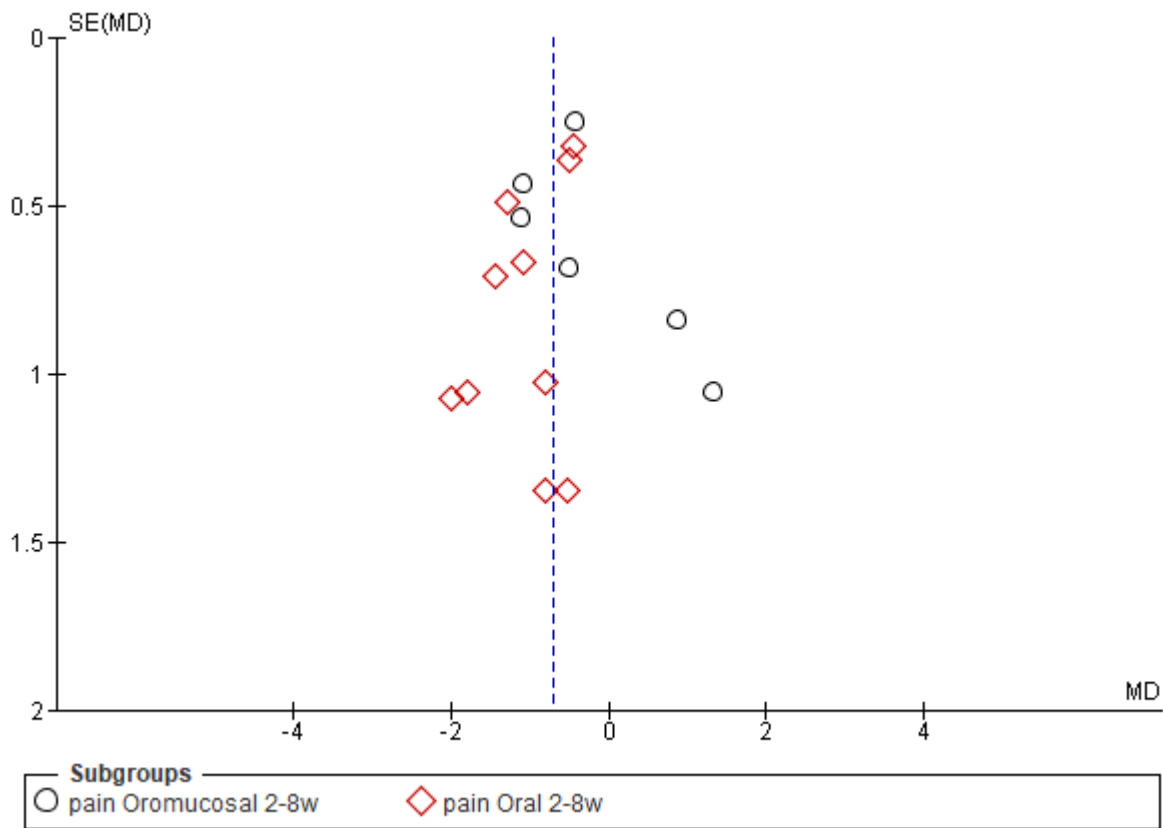

e-Figure 8. Funnel plot of medical cannabis (intervention) versus placebo (control) for chronic non-cancer pain at 2-8 weeks follow-up by route of administration, to assess for publication bias. Effect estimates (mean difference MD) is on the x-axis, study precision (standard error, SE) is on the y-axis.



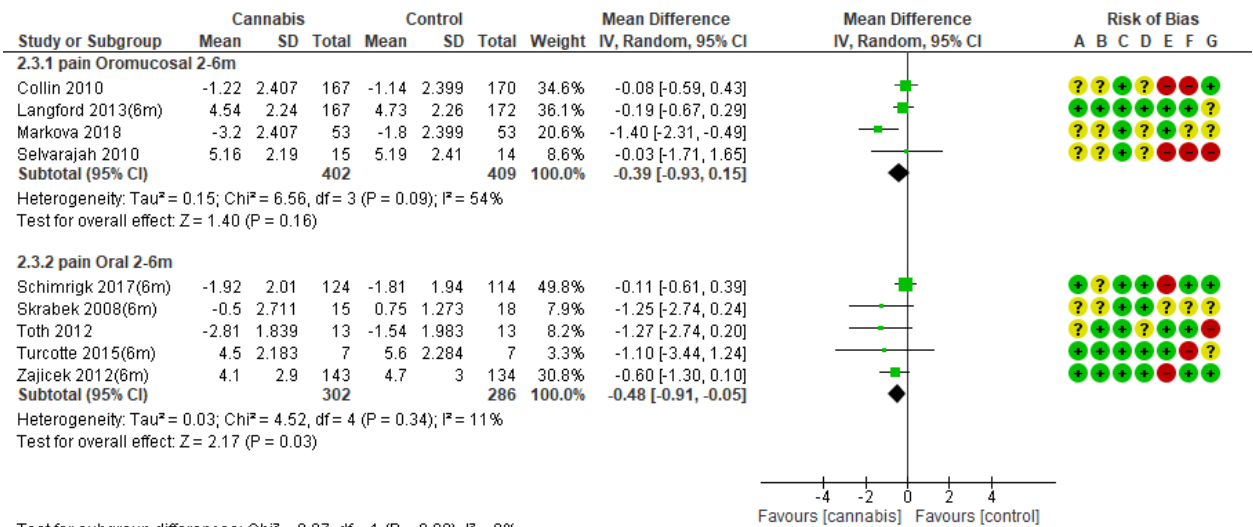

e-Figure 9. Forest plot of medical cannabis (intervention) versus placebo (control) for chronic non-cancer pain (0-10 visual analogue scale, higher score more pain) at 2-6 months follow-up, stratified by route of administration.

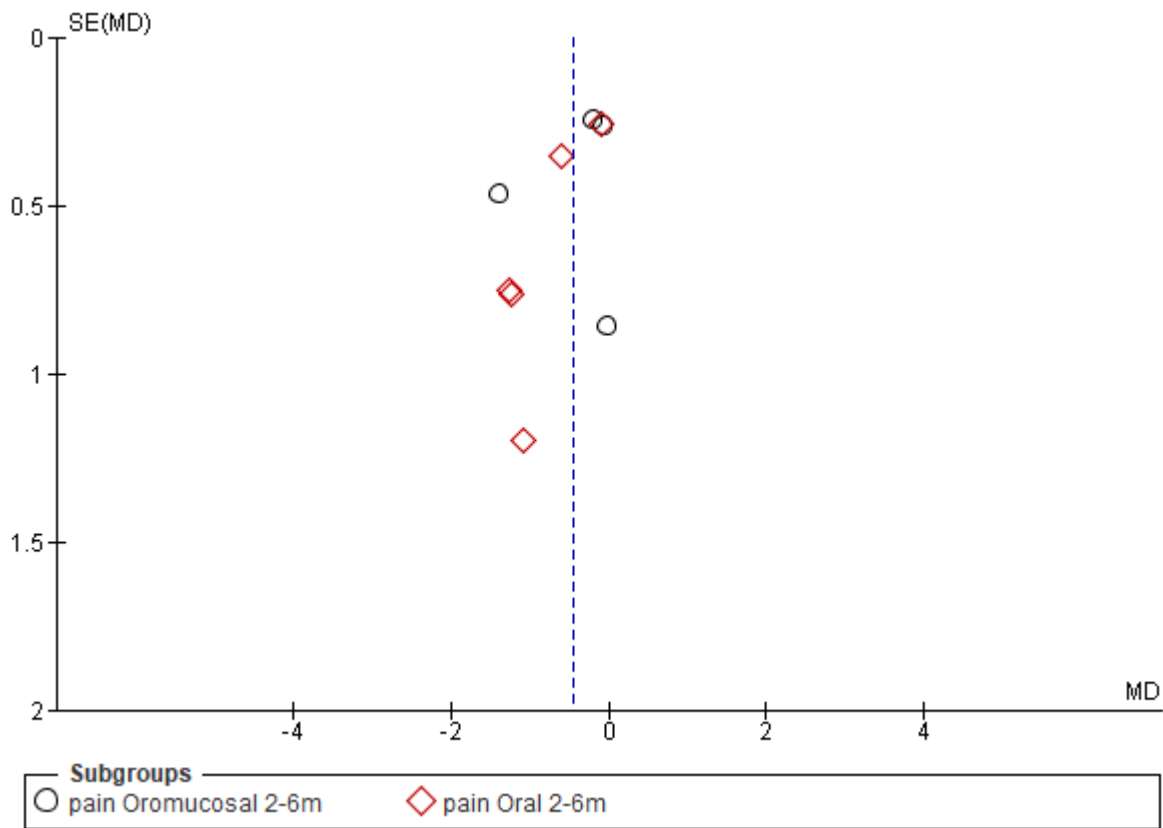

e-Figure 10. Funnel plot of medical cannabis (intervention) versus placebo (control) for chronic non-cancer pain at 2-6 months follow-up by route of administration, to assess for publication bias. Effect estimates (mean difference MD) is on the x-axis, study precision (standard error, SE) is on the y-axis.

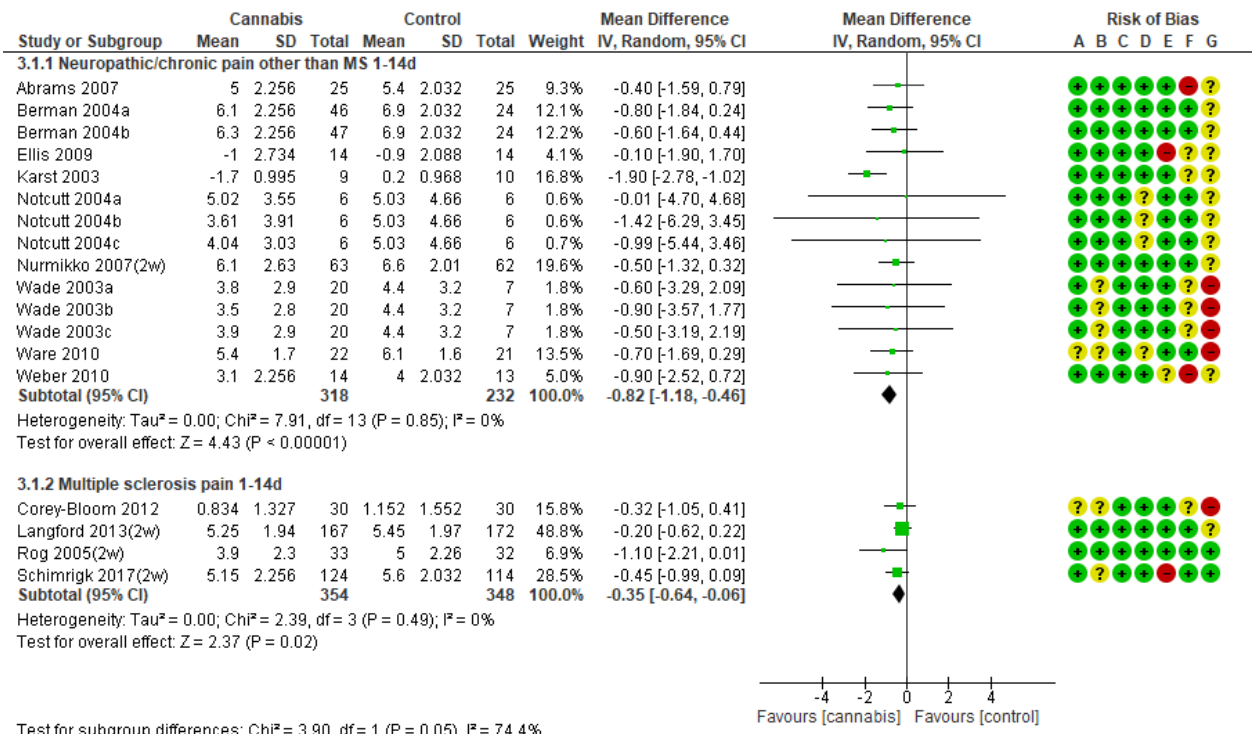

e-Figure 11. Forest plot of medical cannabis (intervention) versus placebo (control) for chronic non-cancer pain (0-10 visual analogue scale, higher score more pain) at 1-14 days follow-up, stratified by pain condition.

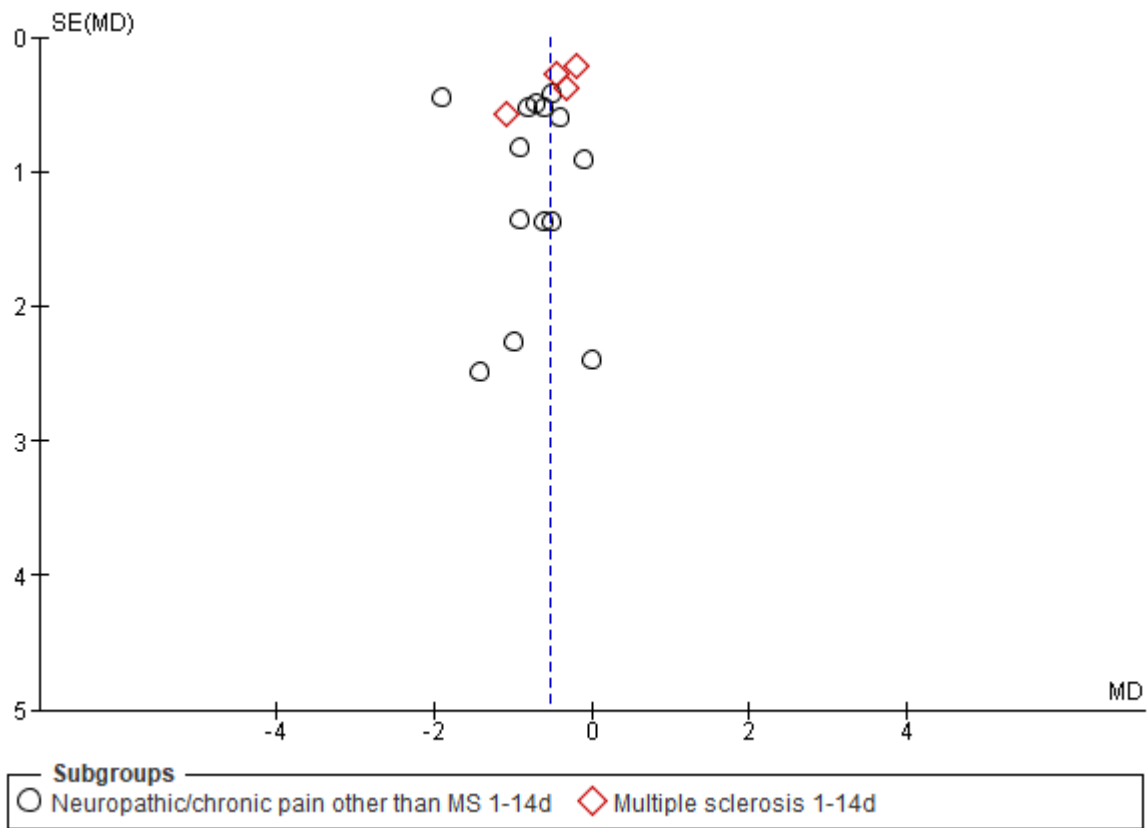

e-Figure 12. Funnel plot of medical cannabis (intervention) versus placebo (control) for chronic non-cancer pain at 1-14 days follow-up by pain condition, to assess for publication bias. Effect estimates (mean difference MD) is on the x-axis, study precision (standard error, SE) is on the y-axis.

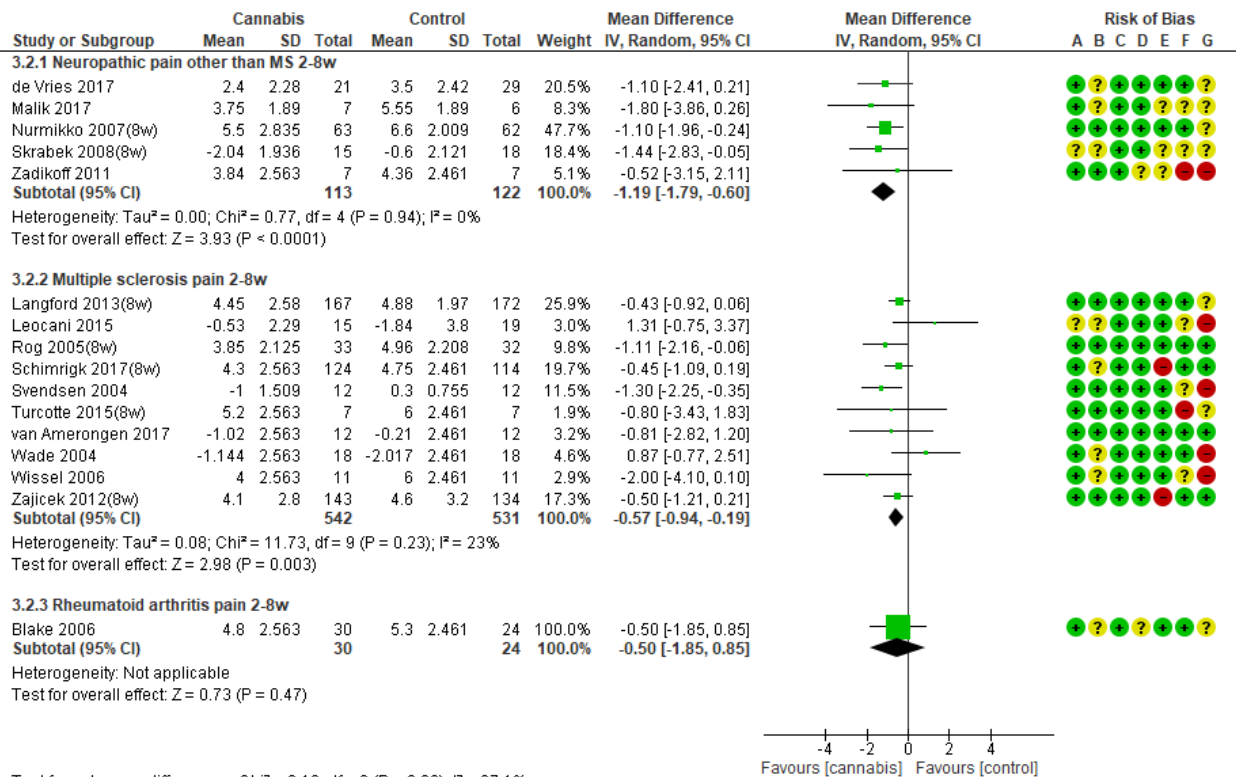

e-Figure 13. Forest plot of medical cannabis (intervention) versus placebo (control) for chronic non-cancer pain (0-10 visual analogue scale, higher score more pain) at 2-8 weeks follow-up, stratified by pain condition.

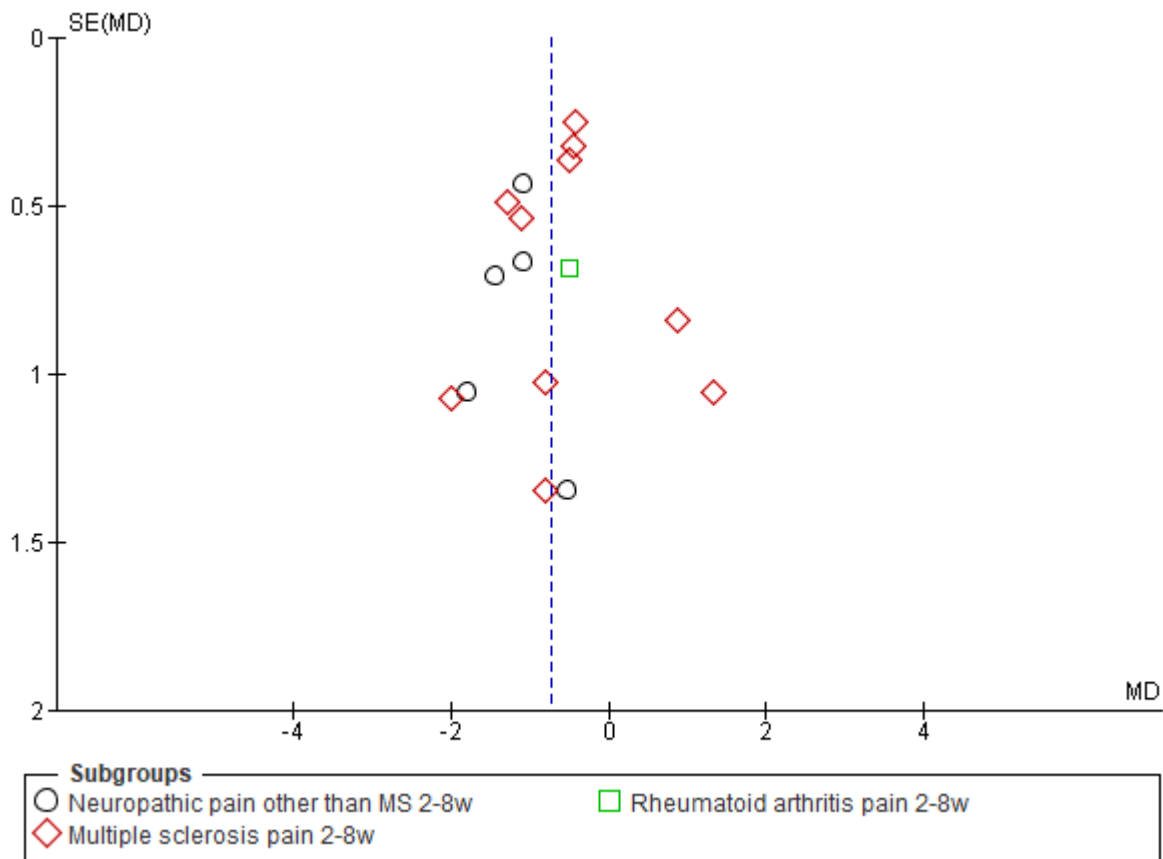

e-Figure 14. Funnel plot of medical cannabis (intervention) versus placebo (control) for chronic non-cancer pain at 2-8 weeks follow-up by pain condition, to assess for publication bias. Effect estimates (mean difference MD) is on the x-axis, study precision (standard error, SE) is on the y-axis.

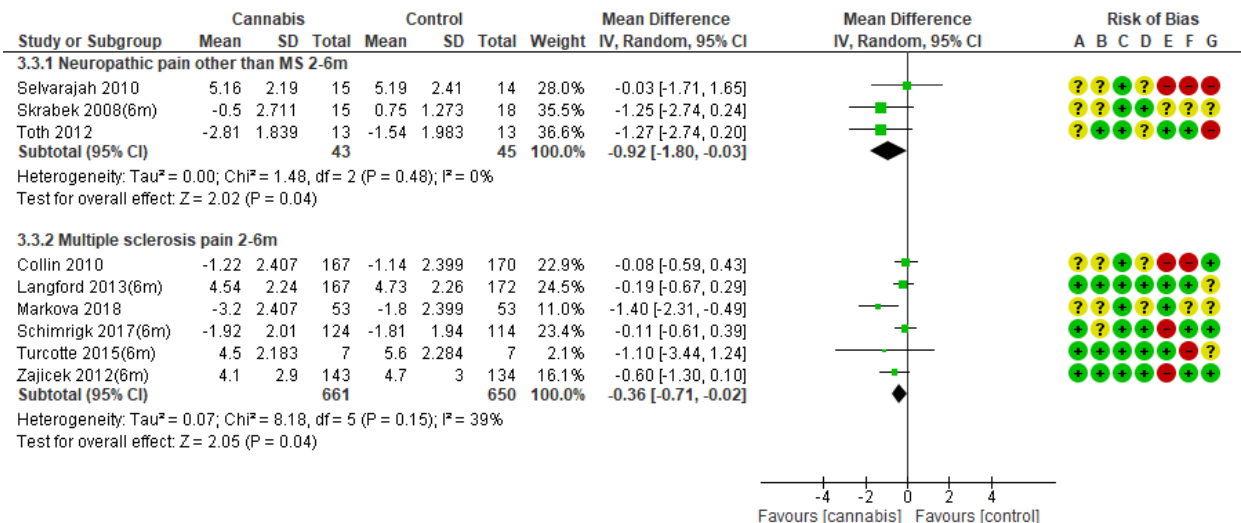

e-Figure 15. Forest plot of medical cannabis (intervention) versus placebo (control) for chronic non-cancer pain (0-10 visual analogue scale, higher score more pain) at 2-6 months follow-up, stratified by pain condition.

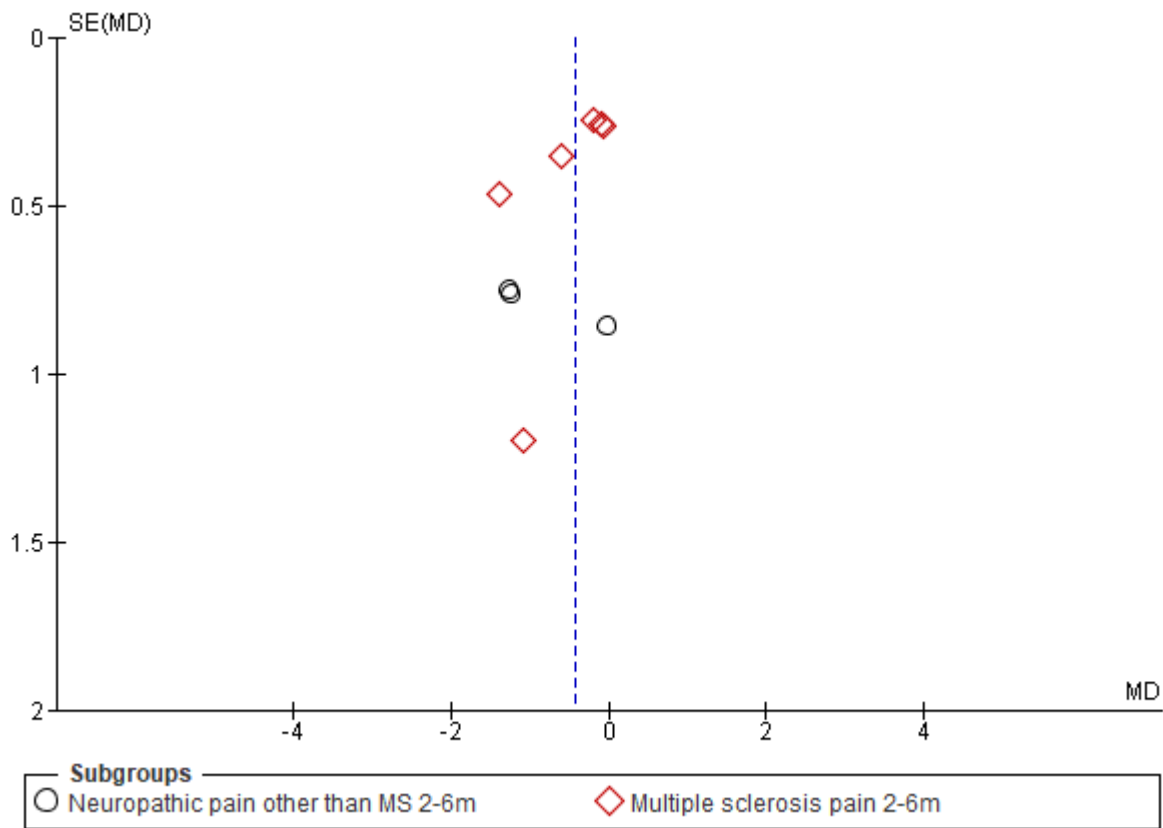

e-Figure 16. Funnel plot of medical cannabis (intervention) versus placebo (control) for chronic non-cancer pain at 2-6 months follow-up by pain condition, to assess for publication bias. Effect estimates (mean difference MD) is on the x-axis, study precision (standard error, SE) is on the y-axis.





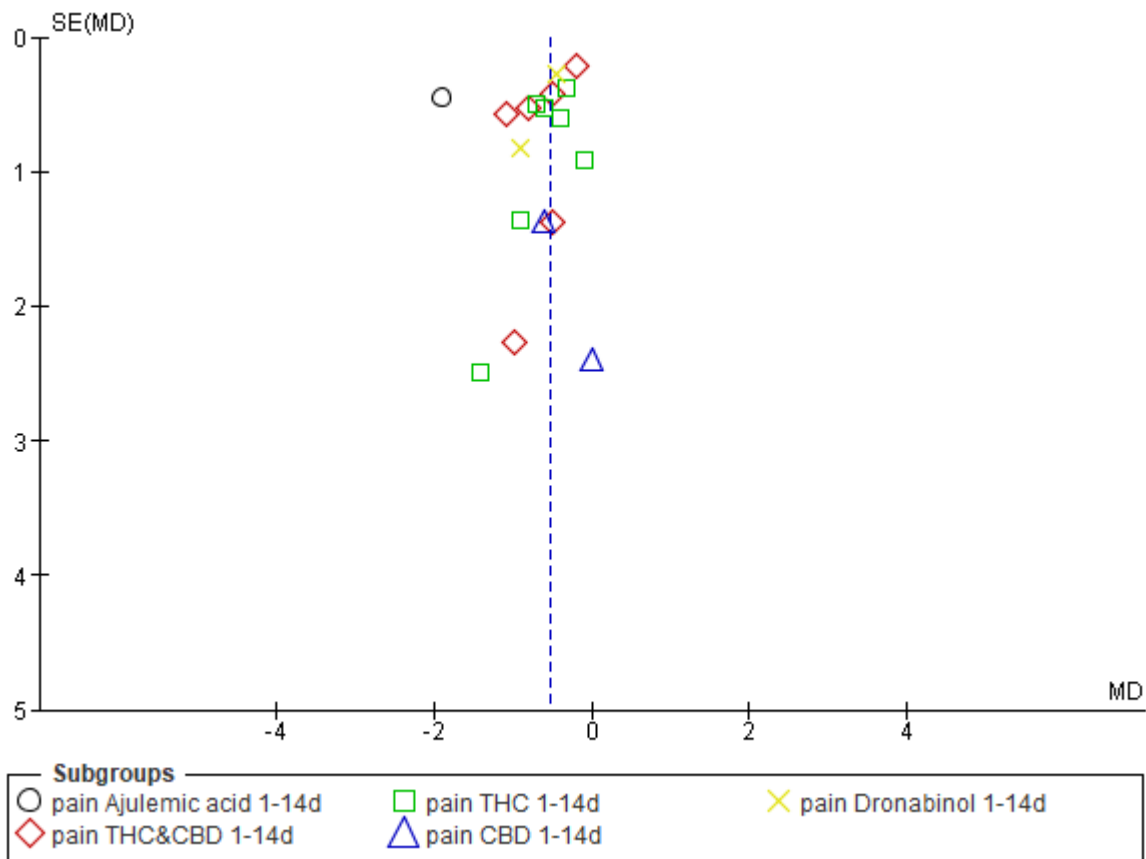

e-Figure 18. Funnel plot of medical cannabis (intervention) versus placebo (control) for chronic non-cancer pain at 1-14 days follow-up by type of drug, to assess for publication bias. Effect estimates (mean difference MD) is on the x-axis, study precision (standard error, SE) is on the y-axis.

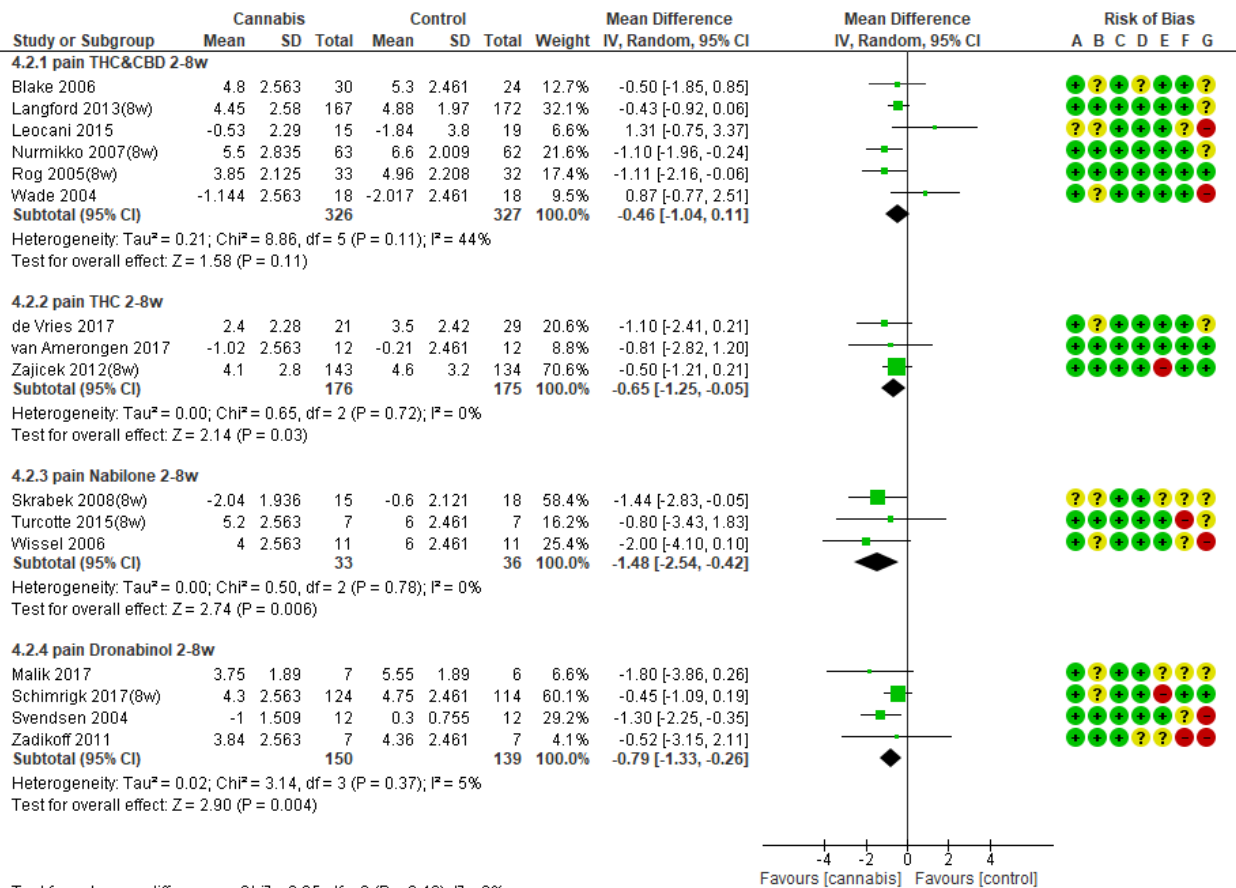

Risk of bias legend

- (A) Random sequence generation (selection bias)
- (B) Allocation concealment (selection bias)
- (C) Blinding of participants and personnel (performance bias)
- (D) Blinding of outcome assessment (detection bias)
- (E) Incomplete outcome data (attrition bias)
- (F) Selective reporting (reporting bias)
- (G) Other bias

e-Figure 19. Forest plot of medical cannabis (intervention) versus placebo (control) for chronic non-cancer pain (0-10 visual analogue scale, higher score more pain) at 2-8 weeks follow-up, stratified by type of drug.

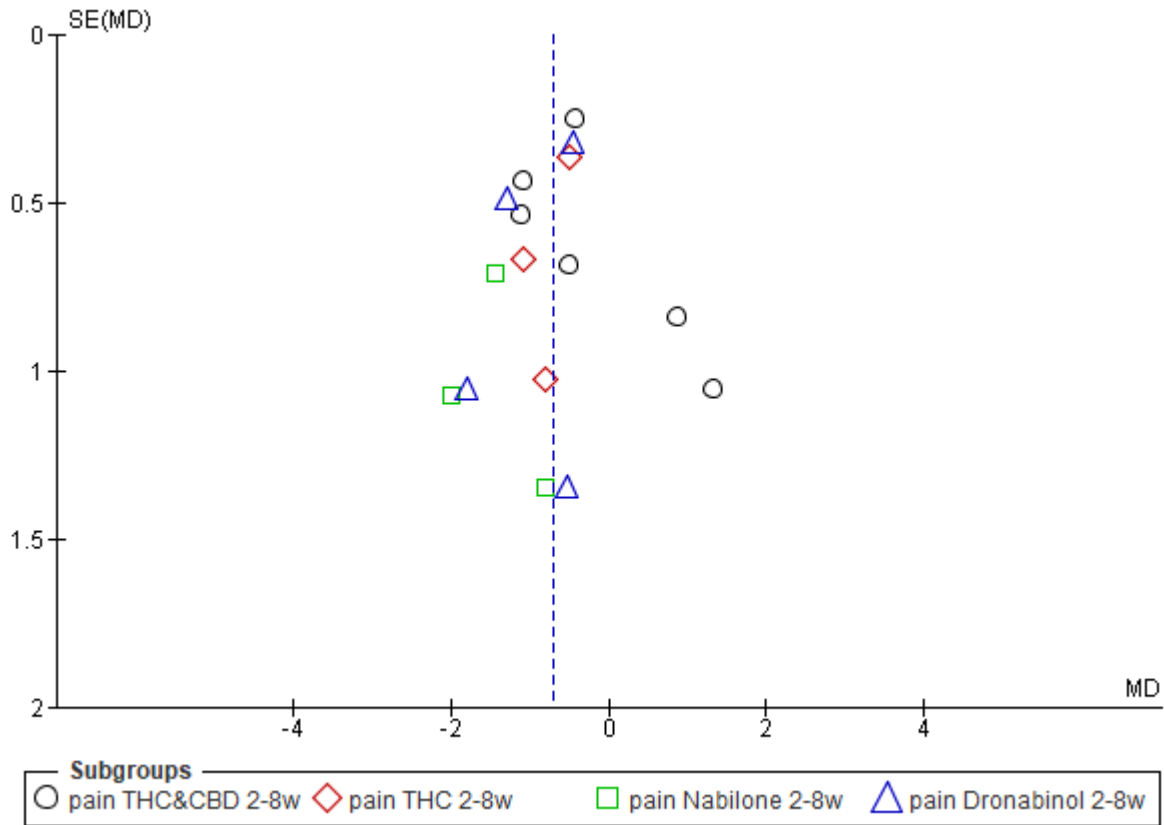

e-Figure 20. Funnel plot of medical cannabis (intervention) versus placebo (control) for chronic non-cancer pain at 2-8 weeks follow-up by type of drug, to assess for publication bias. Effect estimates (mean difference MD) is on the x-axis, study precision (standard error, SE) is on the y-axis.

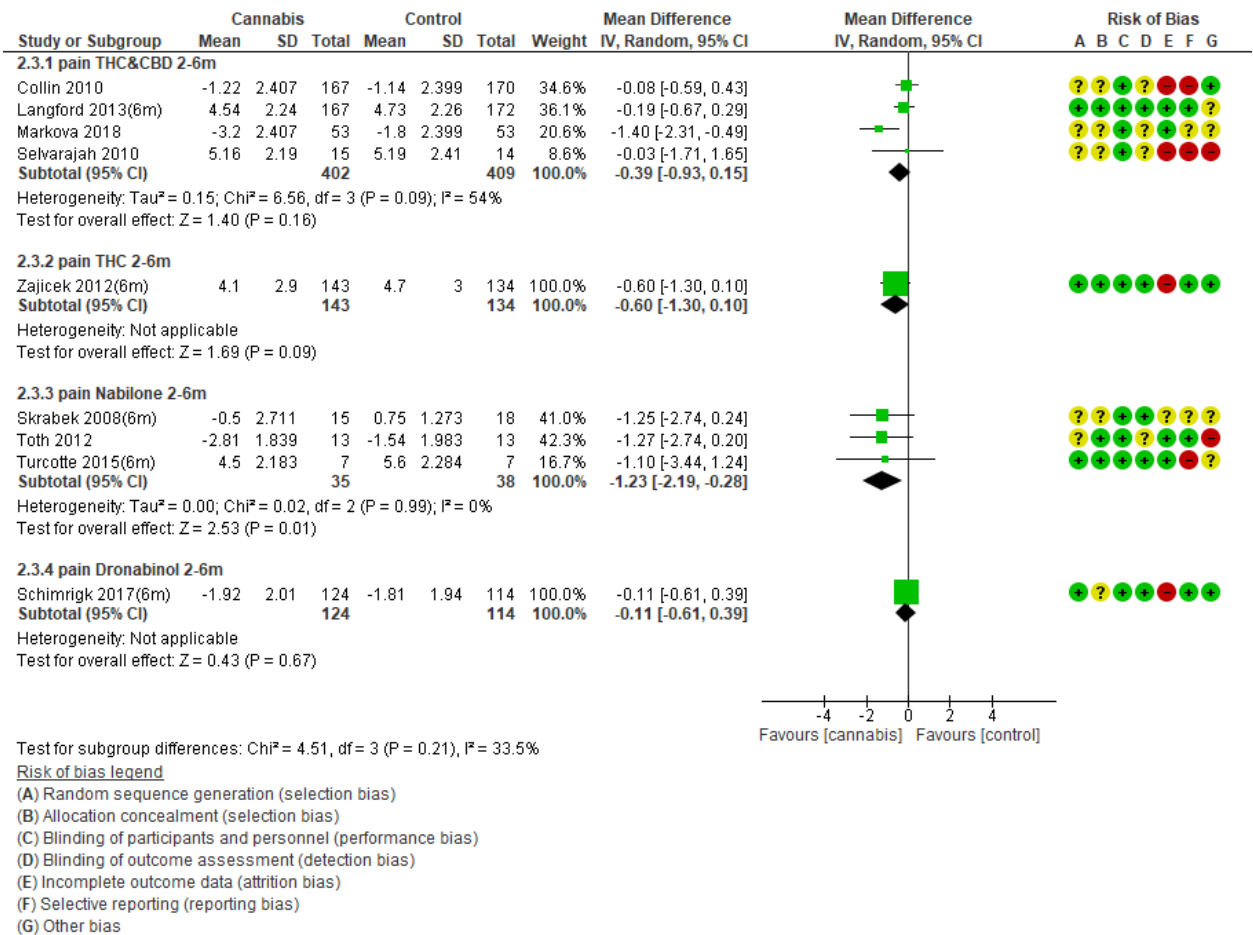

e-Figure 21. Forest plot of medical cannabis (intervention) versus placebo (control) for chronic non-cancer pain (0-10 visual analogue scale, higher score more pain) at 2-6 months follow-up, stratified by type of drug.

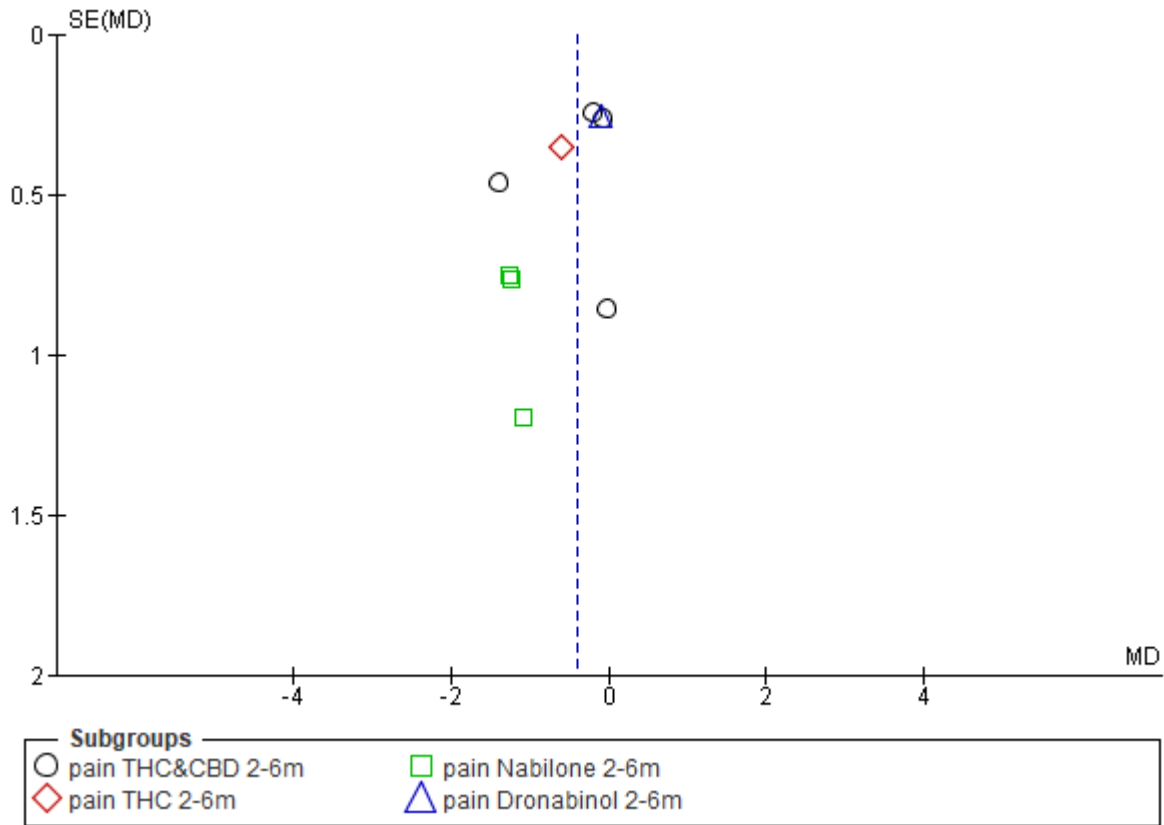

e-Figure 22. Funnel plot of medical cannabis (intervention) versus placebo (control) for chronic non-cancer pain at 2-6 months follow-up by type of drug, to assess for publication bias. Effect estimates (mean difference MD) is on the x-axis, study precision (standard error, SE) is on the y-axis.

## **e-Tables 1 and 2**

### **e-Table 1 - MEDLINE Database specific search strategy**

1. exp pain/
2. exp chronic pain/
3. pain\$.mp.
4. (chronic or intractable or refractory or persistent).mp.
5. 1 or 3
6. 4 and 5
7. 2 or 6
8. fibromyalgia.mp.
9. fibrositis.mp.
10. arthriti\$.mp.
11. back pain.mp.
12. neck pain.mp.
13. exp musculoskeletal diseases/
14. exp joint diseases/
15. exp back pain/
16. exp multiple sclerosis/
17. multiple sclerosis.mp.
18. allodynia.mp.
19. sciatic\$.mp.
20. neuralgia.mp.
21. neuropath\$.mp.
22. or/7-21
23. cannabis.mp.
24. exp cannabis/
25. cannabinoid\$.mp.
26. exp cannabinoids/
27. tetrahydrocannabinol.mp.
28. exp dronabinol/
29. cannabidiol.mp.

30. exp cannabidiol/
31. sativex.mp.
32. exp medical marijuana/
33. nabiximols.mp.
34. thc.mp.
35. nabilone.mp.
36. cesamet.mp.
37. marinol.mp.
38. marihuana.mp.
39. marijuana.mp.
40. hashish.mp.
41. or/23-40
42. 22 and 41
43. randomized controlled trial.pt.
44. controlled clinical trial.pt.
45. randomized.ab.
46. placebo.ab.
47. drug therapy.fs.
48. randomly.ab.
49. trial.ab.
50. groups.ab.
51. or/43-50
52. 42 and 51
53. exp animals/ not humans/
54. 52 not 53



e-Table 2 – Demographic and treatment arm details for included studies

| Author (Year)               | Route of admin   | Country                          | RCT Type      | No. of Participants randomized | Group                                                             | No./ arm |
|-----------------------------|------------------|----------------------------------|---------------|--------------------------------|-------------------------------------------------------------------|----------|
| Abrams (2007) <sup>1</sup>  | Inhaled (smoked) | United States                    | Parallel RCT  | 55                             | (1) Cannabis (3.56% THC)                                          | 27       |
|                             |                  |                                  |               |                                | (2) Placebo                                                       | 28       |
| Ball (2015) <sup>2</sup>    | Oral             | United Kingdom                   | Parallel RCT  | 498                            | (1) Dronabinol (Synthetic delta-9 THC, 3.5-28mg/day)              | 332      |
|                             |                  |                                  |               |                                | (2) Placebo                                                       | 166      |
| Berman (2004) <sup>3</sup>  | Oromucosal spray | United Kingdom                   | Crossover RCT | 48                             | (1) Nabiximol (THC 27mg/ml:CBD 25mg/ml)                           | 46       |
|                             |                  |                                  |               |                                | (2) THC only (THC 27mg/ml)                                        | 47       |
|                             |                  |                                  |               |                                | (3) Placebo                                                       | 48       |
| Blake (2006) <sup>4</sup>   | Oromucosal spray | United Kingdom                   | Parallel RCT  | 58                             | (1) Nabiximol (THC 27mg/ml:CBD 25mg/ml)                           | 31       |
|                             |                  |                                  |               |                                | (2) Placebo                                                       | 27       |
| Carroll (2004) <sup>5</sup> | Oral             | United Kingdom                   | Crossover RCT | 19                             | (1) Cannabis Extract capsule (THC 2.5mg/CBD 1.25mg/5 to 25mg/day) | 19       |
|                             |                  |                                  |               |                                | (2) Placebo                                                       | 19       |
| Collin (2010) <sup>6</sup>  | Oromucosal spray | Czech Republic<br>United Kingdom | Parallel RCT  | 337                            | (1) Nabiximol (THC 27mg/ml:CBD 25mg/ml)                           | 167      |
|                             |                  |                                  |               |                                | (2) Placebo                                                       | 170      |
|                             |                  | United States                    | Crossover RCT | 37                             | (1) Cannabis (4.0% THC)                                           | 30       |

|                                     |                     |                                                               |               |     |                                                                                         |     |
|-------------------------------------|---------------------|---------------------------------------------------------------|---------------|-----|-----------------------------------------------------------------------------------------|-----|
| Corey-Bloom<br>(2012) <sup>7</sup>  | Inhaled<br>(smoked) |                                                               |               |     | (2) Placebo                                                                             | 30  |
| de Vries<br>(2017) <sup>8</sup>     | Oral                | Netherlands                                                   | Parallel RCT  | 65  | (1) Namisol (Synthetic delta-9 THC, 3mg TID x 5d,<br>5ma TID x 5d. then 8ma TID)        | 30  |
|                                     |                     |                                                               |               |     | (2) Placebo                                                                             | 32  |
| Ellis<br>(2009) <sup>9</sup>        | Inhaled<br>(smoked) | United States                                                 | Crossover RCT | 34  | (1) Cannabis (1-8% THC)                                                                 | 34  |
|                                     |                     |                                                               |               |     | (2) Placebo                                                                             | 34  |
| Hagenbach<br>(2007) <sup>10</sup>   | Oral                | Switzerland                                                   | Parallel RCT  | 13  | (1) Dronabinol (Synthetic delta-9 THC, 2.5-10mg/tab)                                    | 6   |
|                                     |                     |                                                               |               |     | (2) Placebo                                                                             | 7   |
| Karst<br>(2003) <sup>11</sup>       | Oral                | Germany                                                       | Crossover RCT | 21  | (1) Ajulemic acid, CT3 (Synthetic THC-11, 20mg BID x<br>4 days, then 40mg BID x 3 days) | 21  |
|                                     |                     |                                                               |               |     | (2) Placebo                                                                             | 21  |
| Killenstein<br>(2002) <sup>12</sup> | Oral                | Netherlands                                                   | Crossover RCT | 16  | (1) Dronabinol (Synthetic delta-9 THC, 2.5-10mg/tab)                                    | 16  |
|                                     |                     |                                                               |               |     | (2) Cannabis Extract capsule (THC 2.5mg/CBD 20 to<br>30%) up to 10ma/dav                | 16  |
|                                     |                     |                                                               |               |     | (3) Placebo                                                                             | 16  |
| Langford<br>(2013) <sup>13</sup>    | Oromucosal<br>spray | Canada<br>Czech Republic<br>France<br>Spain<br>United Kingdom | Parallel RCT  | 339 | (1) Nabiximol (THC 27mg/ml:CBD 25mg/ml)                                                 | 167 |
|                                     |                     |                                                               |               |     | (2) Placebo                                                                             | 172 |
| Leocani<br>(2015) <sup>14</sup>     | Oromucosal<br>spray | Italy                                                         | Crossover RCT | 44  | (1) Nabiximol (THC 27mg/ml:CBD 25mg/ml)                                                 | 44  |
|                                     |                     |                                                               |               |     | (2) Placebo                                                                             | 44  |
| Malik                               | Oral                | United States                                                 | Parallel RCT  | 13  | (1) Dronabinol (Synthetic delta-9 THC, 5mg BID x 4<br>weeks)                            | 7   |

|                                   |                     |                                                              |               |     |                                                                                                                            |                      |
|-----------------------------------|---------------------|--------------------------------------------------------------|---------------|-----|----------------------------------------------------------------------------------------------------------------------------|----------------------|
| (2017) <sup>15</sup>              |                     |                                                              |               |     | (2) Placebo                                                                                                                | 6                    |
| Markova<br>(2018) <sup>16</sup>   | Oromucosal<br>spray | Czech Republic<br>Austria                                    | Parallel RCT  | 106 | (1) Nabiximol (THC 27mg/ml:CBD 25mg/ml)<br>(2) Placebo                                                                     | 53<br>53             |
| Notcutt<br>(2004) <sup>17</sup>   | Oromucosal<br>spray | United Kingdom                                               | Crossover RCT | 34  | (1) Nabiximol (THC 2.5mg:CBD 2.5/spray)<br>(2) THC only (THC 2.5mg/spray)<br>(3) CBD only (CBD 2.5mg/spray)<br>(4) Placebo | 24<br>24<br>24<br>24 |
| Novotna<br>(2011) <sup>18</sup>   | Oromucosal<br>spray | Czech Republic<br>Italy<br>Poland<br>Spain<br>United Kingdom | Parallel RCT  | 241 | (1) Nabiximol (THC 27mg/ml:CBD 25mg/ml)<br>(2) Placebo                                                                     | 124<br>117           |
| Nurmikko<br>(2007) <sup>19</sup>  | Oromucosal<br>spray | Belgium<br>United Kingdom                                    | Parallel RCT  | 125 | (1) Nabiximol (THC 27mg/ml:CBD 25mg/ml)<br>(2) Placebo                                                                     | 63<br>62             |
| Rog<br>(2005) <sup>20</sup>       | Oromucosal<br>spray | United Kingdom                                               | Parallel RCT  | 66  | (1) Nabiximol (THC 27mg/ml:CBD 25mg/ml)<br>(2) Placebo                                                                     | 34<br>32             |
| Schimrigk<br>(2017) <sup>21</sup> | Oral                | Germany                                                      | Parallel RCT  | 240 | (1) Dronabinol (Synthetic delta-9 THC, 7.5mg to<br>15mg/day x 4 weeks)<br>(2) Placebo                                      | 124<br>116           |
|                                   |                     | United Kingdom                                               | Parallel RCT  | 30  | (1) Nabiximol (THC 27mg/ml:CBD 25mg/ml)                                                                                    | 15                   |

|                                          |                     |                                                                  |               |     |                                                                 |     |
|------------------------------------------|---------------------|------------------------------------------------------------------|---------------|-----|-----------------------------------------------------------------|-----|
| Selvarajah<br>(2010) <sup>22</sup>       | Oromucosal<br>spray |                                                                  |               |     | (2) Placebo                                                     | 15  |
| Serpell<br>(2014) <sup>23</sup>          | Oromucosal<br>spray | Canada<br>Belgium<br>Czech Republic<br>Romania<br>United Kingdom | Parallel RCT  | 246 | (1) Nabiximol (THC 27mg/ml:CBD 25mg/ml)                         | 128 |
|                                          |                     |                                                                  |               |     | (2) Placebo                                                     | 118 |
| Skrabek<br>(2008) <sup>24</sup>          | Oral                | Canada                                                           | Parallel RCT  | 40  | (1) Nabilone (Synthetic Cannabinoid, 0.5 - 1.0mg BID x 4 weeks) | 20  |
|                                          |                     |                                                                  |               |     | (2) Placebo                                                     | 20  |
| Svendsen<br>(2004) <sup>25</sup>         | Oral                | Denmark                                                          | Crossover RCT | 24  | (1) Dronabinol (Synthetic delta-9 THC, 5mg BID x 20 days)       | 24  |
|                                          |                     |                                                                  |               |     | (2) Placebo                                                     | 24  |
| Toth<br>(2012) <sup>26</sup>             | Oral                | Canada                                                           | Parallel RCT  | 26  | (1) Nabilone (Synthetic Cannabinoid, 1.0 - 4.0mg/day x 9 weeks) | 13  |
|                                          |                     |                                                                  |               |     | (2) Placebo                                                     | 13  |
| Turcotte<br>(2015) <sup>27</sup>         | Oral                | Canada                                                           | Parallel RCT  | 15  | (1) Nabilone (Synthetic Cannabinoid, 0.5 - 1.0mg BID x 61 days) | 8   |
|                                          |                     |                                                                  |               |     | (2) Placebo                                                     | 7   |
| van<br>Amerongen<br>(2017) <sup>28</sup> | Oral                | Netherlands                                                      | Parallel RCT  | 24  | (1) Namisol (Synthetic delta-9 THC, 16mg/day x 4 weeks)         | 12  |
|                                          |                     |                                                                  |               |     | (2) Placebo                                                     | 12  |
| Wade<br>(2003) <sup>29</sup>             | Oromucosal<br>spray | United Kingdom                                                   | Crossover RCT | 24  | (1) CBD only (CBD 2.5mg per spray)                              | 24  |
|                                          |                     |                                                                  |               |     | (2) THC only (THC 2.5mg per spray)                              | 24  |
|                                          |                     |                                                                  |               |     | (3) Nabiximol (THC 2.5mg:CBD 2.5mg per spray)                   | 24  |

|                                  |                     |                |               |     |                                                                                                                                           |                   |
|----------------------------------|---------------------|----------------|---------------|-----|-------------------------------------------------------------------------------------------------------------------------------------------|-------------------|
|                                  |                     |                |               |     | (4) Placebo                                                                                                                               | 24                |
| Wade<br>(2004) <sup>30</sup>     | Oromucosal<br>spray | United Kingdom | Parallel RCT  | 160 | (1) Nabiximol (THC 27mg/ml:CBD 25mg/ml)<br>(2) Placebo                                                                                    | 80<br>80          |
| Ware<br>(2010) <sup>31</sup>     | Inhaled<br>(smoked) | Canada         | Crossover RCT | 23  | (1) Smoked cannabis (9.4% THC)<br>(2) Placebo                                                                                             | 23<br>23          |
| Weber<br>(2010) <sup>32</sup>    | Oral                | Switzerland    | Crossover RCT | 27  | (1) Dronabinol (Synthetic delta-9 THC, 5mg BID x 2<br>weeks)<br>(2) Placebo                                                               | 27<br>27          |
| Wissel<br>(2006) <sup>33</sup>   | Oral                | Austria        | Crossover RCT | 13  | (1) Nabilone (Synthetic Cannabinoid, 1.0mg/day x 4<br>weeks)<br>(2) Placebo                                                               | 13<br>13          |
| Zadikoff<br>(2011) <sup>34</sup> | Oral                | Canada         | Crossover RCT | 9   | (1) Dronabinol (Synthetic delta-9 THC, 2.5-15mg/day x<br>3 weeks)<br>(2) Placebo                                                          | 9<br>9            |
| Zajick<br>(2005) <sup>35</sup>   | Oral                | United Kingdom | Parallel RCT  | 657 | (1) Cannabis Extract capsule (THC 2.5mg/CBD<br>1.25mg. 5 to 25mg/day)<br>(2) Marinol (Synthetic delta-9 THC, 3.5-28mg/day)<br>(3) Placebo | 219<br>216<br>222 |
| Zajicek<br>(2012) <sup>36</sup>  | Oral                | United Kingdom | Parallel RCT  | 279 | (1) Cannabis Extract capsule (delta-9 THC 5 to<br>25mg/day x 12 weeks)<br>(2) Placebo                                                     | 144<br>135        |

Notes: THC = tetrahydrocannabinol; CBD = cannabidiol.
